# Supplementary material for: Genome-wide discovery of missing genes in biological pathways of prokaryotes
Source: PubMed Central journal article supplement (PMC3044263; doi:10.1186/1471-2105-12-s1-s1), 2011-02-15

### Additional File3 – SP and SE value.

Calculated average SP and SE with constraints  $system(error) = 0.06$ ,  $\alpha = 380$ ,  $\beta = 5$ , K is changed to 5, 10, 15, 20, 25, 30.

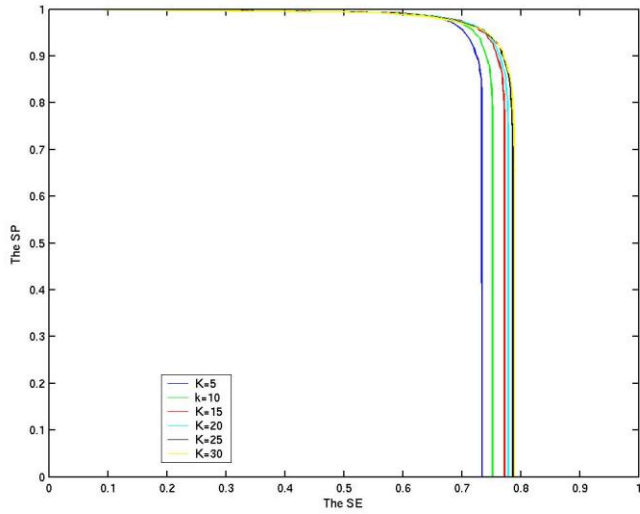

Supplement: 1471-2105-12-S1-S1-S3.pdf [file 1471-2105-12-S1-S1-S3.pdf]
