# Supplementary material for: Genome-wide discovery of missing genes in biological pathways of prokaryotes
Source: PubMed Central journal article supplement (PMC3044263; doi:10.1186/1471-2105-12-s1-s1), 2011-02-15

**Additional File4 – The average PPV rate of *E.coli* pathways based on the 2nd level of KEGG orthology.**

The pathways ( $|G(P)| \geq 5$ ) are calculated with  $system(error) = 0.06, K = 5, \alpha = 380, \beta = 5, \gamma = 10$ .

CM: Carbohydrate Metabolism, AAM: Amino Acid Metabolism, BPNP: Biosynthesis of Polyketides and Nonribosomal Peptides, BSM: Biosynthesis of Secondary Metabolism, CELLM: Cell motility, EM: Energy Metabolism, FSD: Folding Sorting and Degradation, GBM: Glycan Biosynthesis and Metabolism, LM: Lipid Metabolism, MT: Membrane Transport MCV: Metabolism of cofactors and Vitamins, MOAA: Metabolism of Other Amino Acids, NM: Nucleotide Metabolism RR: Replication and Repair, ST: Signal Transduction, TSC: Transcription, TSL: Translation, XBM: Xenobiotics Biodegradation and Metabolism.

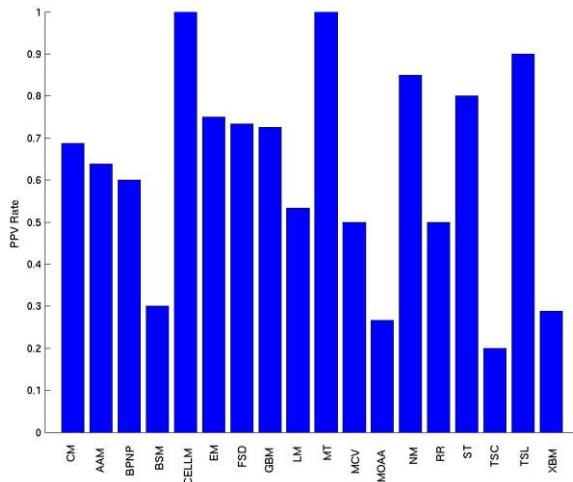

Supplement: 1471-2105-12-S1-S1-S4.pdf [file 1471-2105-12-S1-S1-S4.pdf]
