# Supplementary material for: Genome-wide discovery of missing genes in biological pathways of prokaryotes
Source: PubMed Central journal article supplement (PMC3044263; doi:10.1186/1471-2105-12-s1-s1), 2011-02-15

**Additional File5 – PPV values of individual pathway with  $|G(P)| \geq 30$  .**

The PPV values are calculated based on  $system(error) = 0.06, K = 5, \alpha = 380, \beta = 5,$   
 $\gamma = 10.$

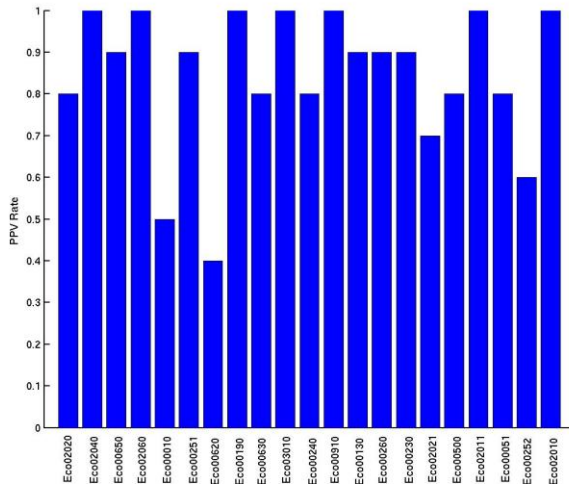

Supplement: 1471-2105-12-S1-S1-S5.pdf [file 1471-2105-12-S1-S1-S5.pdf]
